# Supplementary material
Source: PubMed Central journal article supplement (PMC2000400)

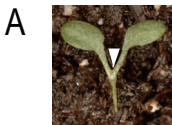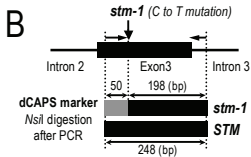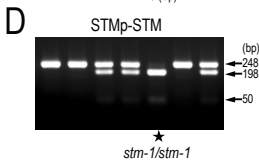

**C**

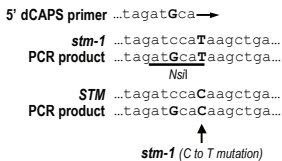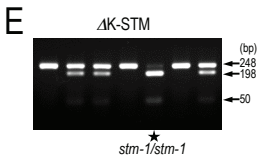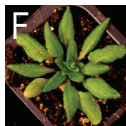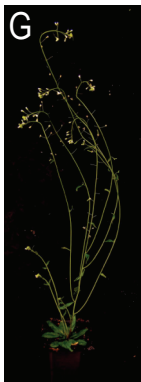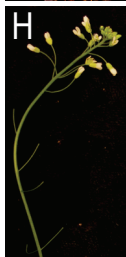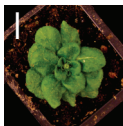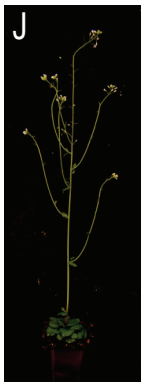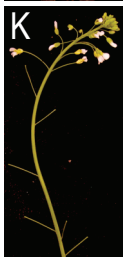

Supplement: pnas_0707577104_1.pdf [file pnas_0707577104_1.pdf]
